# Supplementary material for: Exploring the Potential of Metatranscriptomics to Describe Microbial Communities and Their Effects in Molluscs
Source: MDPI journal article supplement (doi:10.3390/ijms232416029), 2022-12-16

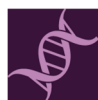

## Supplementary Material

**Table S1.** Methodology comparison. 16S rRNA vs RNA-seq reads.

| Project                    | Sequencing          | Approach                               | Tissue             | Reference    |
|----------------------------|---------------------|----------------------------------------|--------------------|--------------|
| PRJNA858248<br>PRJNA858246 | 16S rRNA sequencing | Amplicon-based<br>analysis             | Whole body         | Current work |
| PRJNA638821<br>PRJNA466718 | RNA sequencing      | Taxonomic profiling<br>(RNA-seq reads) | Gills<br>Hemocytes | [20, 21]     |

**Table S2.** Sequencing general statistics corresponding to methodology comparison

| Sample ID      | Sequencing          | Raw Reads | Trimmed reads | Mapped Reads |
|----------------|---------------------|-----------|---------------|--------------|
| 16_25_1 Mussel | 16S-seq A           | 31546     | 20814         | 14402        |
| 17_15_1 Mussel | 16S-seq A           | 53049     | 37559         | 25578        |
| 17_25_1 Mussel | 16S-seq A           | 24241     | 17733         | 10995        |
| 17_35_1 Mussel | 16S-seq A           | 44329     | 33989         | 20308        |
| 18_15_1 Mussel | 16S-seq A           | 42284     | 29208         | 18870        |
| 18_25_1 Mussel | 16S-seq A           | 113266    | 17253         | 11981        |
| P_23_VB_a      | 16S-seq B           | 314326    | 312099        | 58769        |
| P_43_VB_a      | 16S-seq B           | 303382    | 302638        | 51237        |
| P_64_VB_a      | 16S-seq B           | 336722    | 309205        | 49688        |
| P_88_VB_a      | 16S-seq B           | 336340    | 331256        | 53183        |
| P_119_VB_a     | 16S-seq B           | 355952    | 313551        | 44662        |
| P_873_IB_a     | 16S-seq B           | 321672    | 31349         | 49254        |
| P_902_IB_a     | 16S-seq B           | 293076    | 290484        | 45314        |
| P_936_IB_a     | 16S-seq B           | 325612    | 282659        | 41409        |
| P_968_IB_a     | 16S-seq B           | 408122    | 277324        | 21246        |
| G1             | Metatranscriptomics | 24096934  | 24096915      | 394          |
| G2             | Metatranscriptomics | 21582336  | 21582332      | 206          |
| G3             | Metatranscriptomics | 19815334  | 19815330      | 181          |
| H1             | Metatranscriptomics | 78426948  | 78105397      | 1053         |
| H2             | Metatranscriptomics | 44346584  | 43473220      | 565          |
| H3             | Metatranscriptomics | 100814198 | 100400859     | 3136         |
| H4             | Metatranscriptomics | 17696894  | 17357113      | 3215         |
| H5             | Metatranscriptomics | 93114098  | 92741641      | 1612         |
| H6             | Metatranscriptomics | 96780602  | 96432191      | 2298         |

**Table S3.** Microbiome comparison between gills and hemocytes of *Mytilus galloprovincialis*.

| Project     | Tissue    | SRA code    | Label at the source job | Current label | Sample features | Reference |
|-------------|-----------|-------------|-------------------------|---------------|-----------------|-----------|
| PRJNA638821 | Gills     | SRR11996464 | C1                      | G1            | Control mussel  | [20]      |
|             |           | SRR11996686 | C2                      | G2            | Control mussel  |           |
|             |           | SRR11996723 | C3                      | G3            | Control mussel  |           |
| PRJNA466718 | Hemocytes | SRR7138623  | C2_t0                   | H1            | Control mussel  | [21]      |
|             |           | SRR7138622  | C3_t0                   | H2            | Control mussel  |           |
|             |           | SRR7138621  | C4_t0                   | H3            | Control mussel  |           |
|             |           | SRR7138620  | I1_t0                   | H4            | Control mussel  |           |
|             |           | SRR7138627  | I2_t0                   | H5            | Control mussel  |           |
|             |           | SRR7138626  | I10_t0                  | H6            | Control mussel  |           |

**Table S4.** Microbiome changes occurred in gills and hemocytes of *M. galloprovincialis* after infection stimuli.

| Project     | Tissue    | SRA code    | Label at the source job | Current label | Sample features                                  | Reference |
|-------------|-----------|-------------|-------------------------|---------------|--------------------------------------------------|-----------|
| PRJNA638821 | Gills     | SRR11996464 | C1                      | C1            | Control mussel                                   | [20]      |
|             |           | SRR11996686 | C2                      | C2            | Control mussel                                   |           |
|             |           | SRR11996723 | C3                      | C3            | Control mussel                                   |           |
|             |           | SRR11996734 | I1                      | I1            | Infection with <i>V. splendidus</i> (waterborne) |           |
|             |           | SRR11996735 | I2                      | I2            | Infection with <i>V. splendidus</i> (waterborne) |           |
|             |           | SRR11996743 | I3                      | I3            | Infection with <i>V. splendidus</i> (waterborne) |           |
| PRJNA466718 | Hemocytes | SRR7138620  | I1_t0                   | C1            | Control mussel                                   | [21]      |
|             |           | SRR7138627  | I2_t0                   | C2            | Control mussel                                   |           |
|             |           | SRR7138626  | I10_t0                  | C3            | Control mussel                                   |           |
|             |           | SRR7138618  | I1_24h                  | I1            | <i>V. splendidus</i> injection                   |           |
|             |           | SRR7138611  | I2_24h                  | I2            | <i>V. splendidus</i> injection                   |           |
|             |           | SRR7138610  | I10_24h                 | I3            | <i>V. splendidus</i> injection                   |           |

**Table S5.** Hemocytes microbiome of different evolutionary-related mollusc (*M. galloprovincialis*, *Pecten maximus*, *Haliotis laevis* and *Octopus vulgaris*).

| Project     | Species                      | Tissue    | SRA code                        | Sample features               | Reference |
|-------------|------------------------------|-----------|---------------------------------|-------------------------------|-----------|
| PRJNA466718 | <i>M. galloprovincialis</i>  | Hemocytes | SRR7138620-23,<br>SRR7138626-27 | Pool of 6 control individuals | [21]      |
| PRJNA222492 | <i>Pecten maximus</i>        | Hemocytes | SRR1009240                      | Pool of 3 control individuals | [22]      |
| PRJNA481417 | <i>Haliotis diversicolor</i> | Hemocytes | SRR7529757                      | Pool of 8 control individuals | [23]      |
| PRJNA253995 | <i>Octopus vulgaris</i>      | Hemocytes | SRR1507221                      | Pool of 5 control individuals | [24]      |

**Figure S1.** 16S rRNA sequencing vs Metatranscriptomics using the same samples [19].

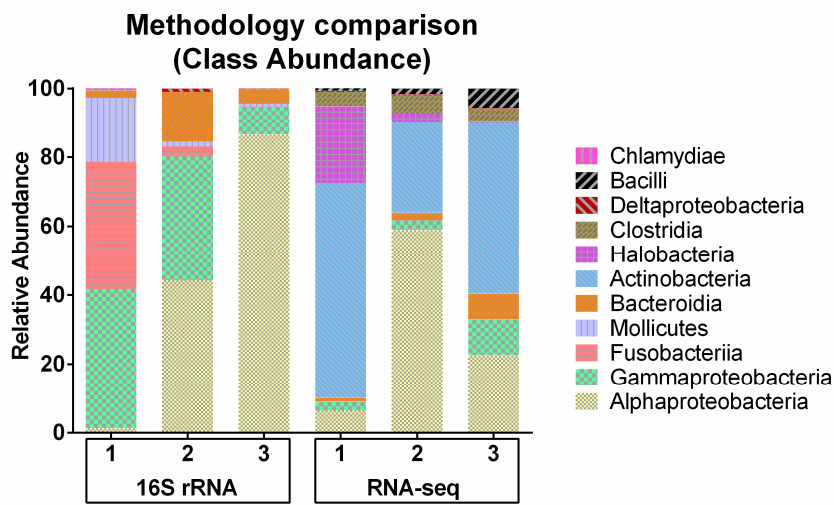

**Figure S2.** Core taxa (Order) shared by all the gills and haemocytes samples. The numbers above the bars in the histogram indicate the quantity of shared taxa. Red color refers to gills and blue to haemocytes.

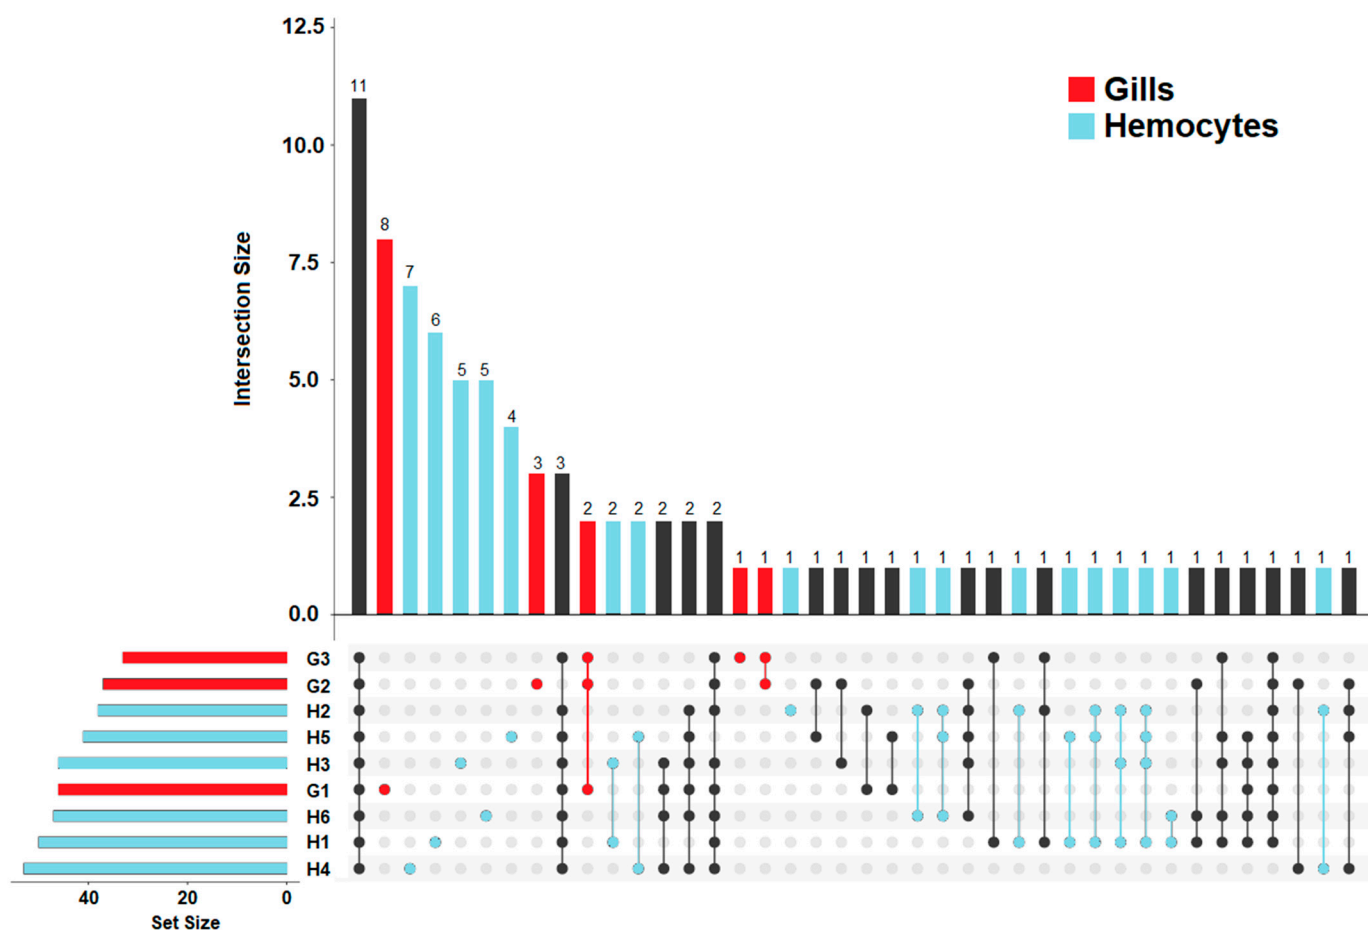

Figure S3. Enrichment analysis comparison between RNA-seq and correlation approaches.

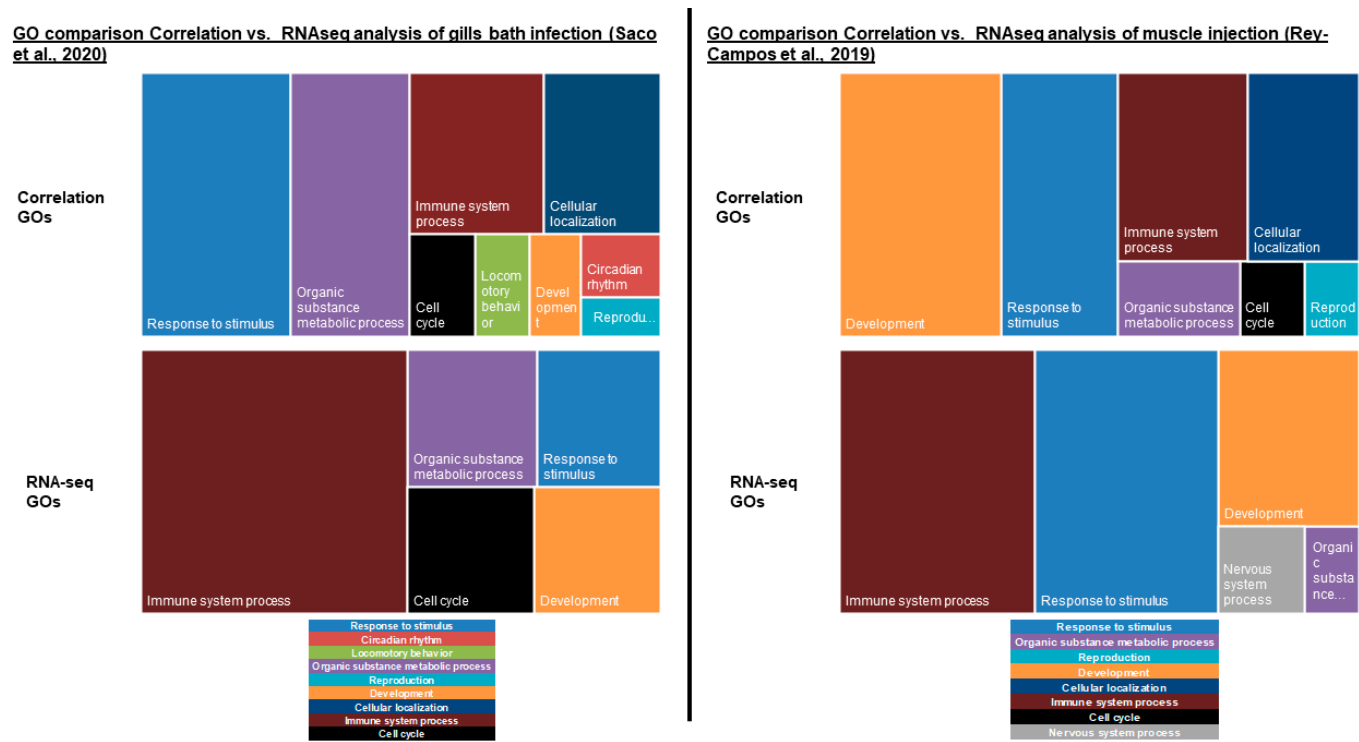

Figure S4. Immune genes showing their expression values strongly correlated to Vibrionales abundance and significantly modulated in the RNA-seq analysis. Table shows immune genes found by correlation.

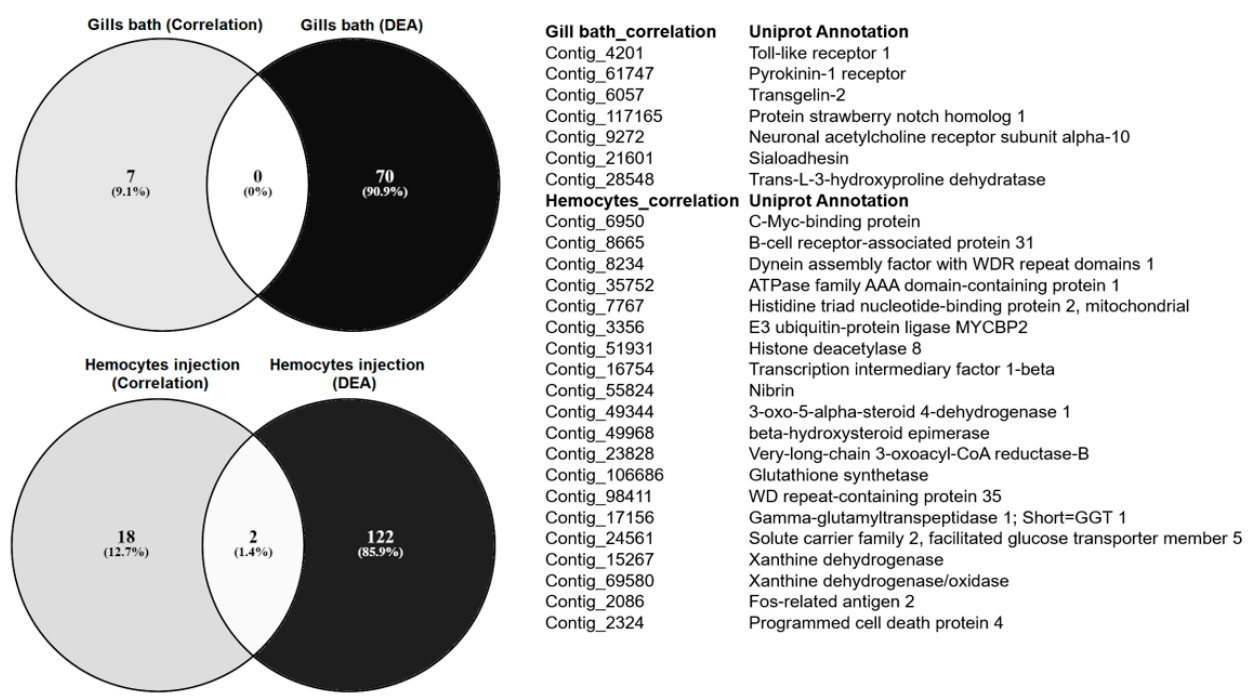

Supplement: s1 [file s1]
